# Supplementary figures and images for: Cross-species gene expression analysis identifies a novel set of genes implicated in human insulin sensitivity
Source: PubMed Central journal article supplement — NPJ Syst Biol Appl. 2015 Nov 12;1:15010–. doi: 10.1038/npjsba.2015.10 (PMC5516867; doi:10.1038/npjsba.2015.10), 2015-11-12

**A**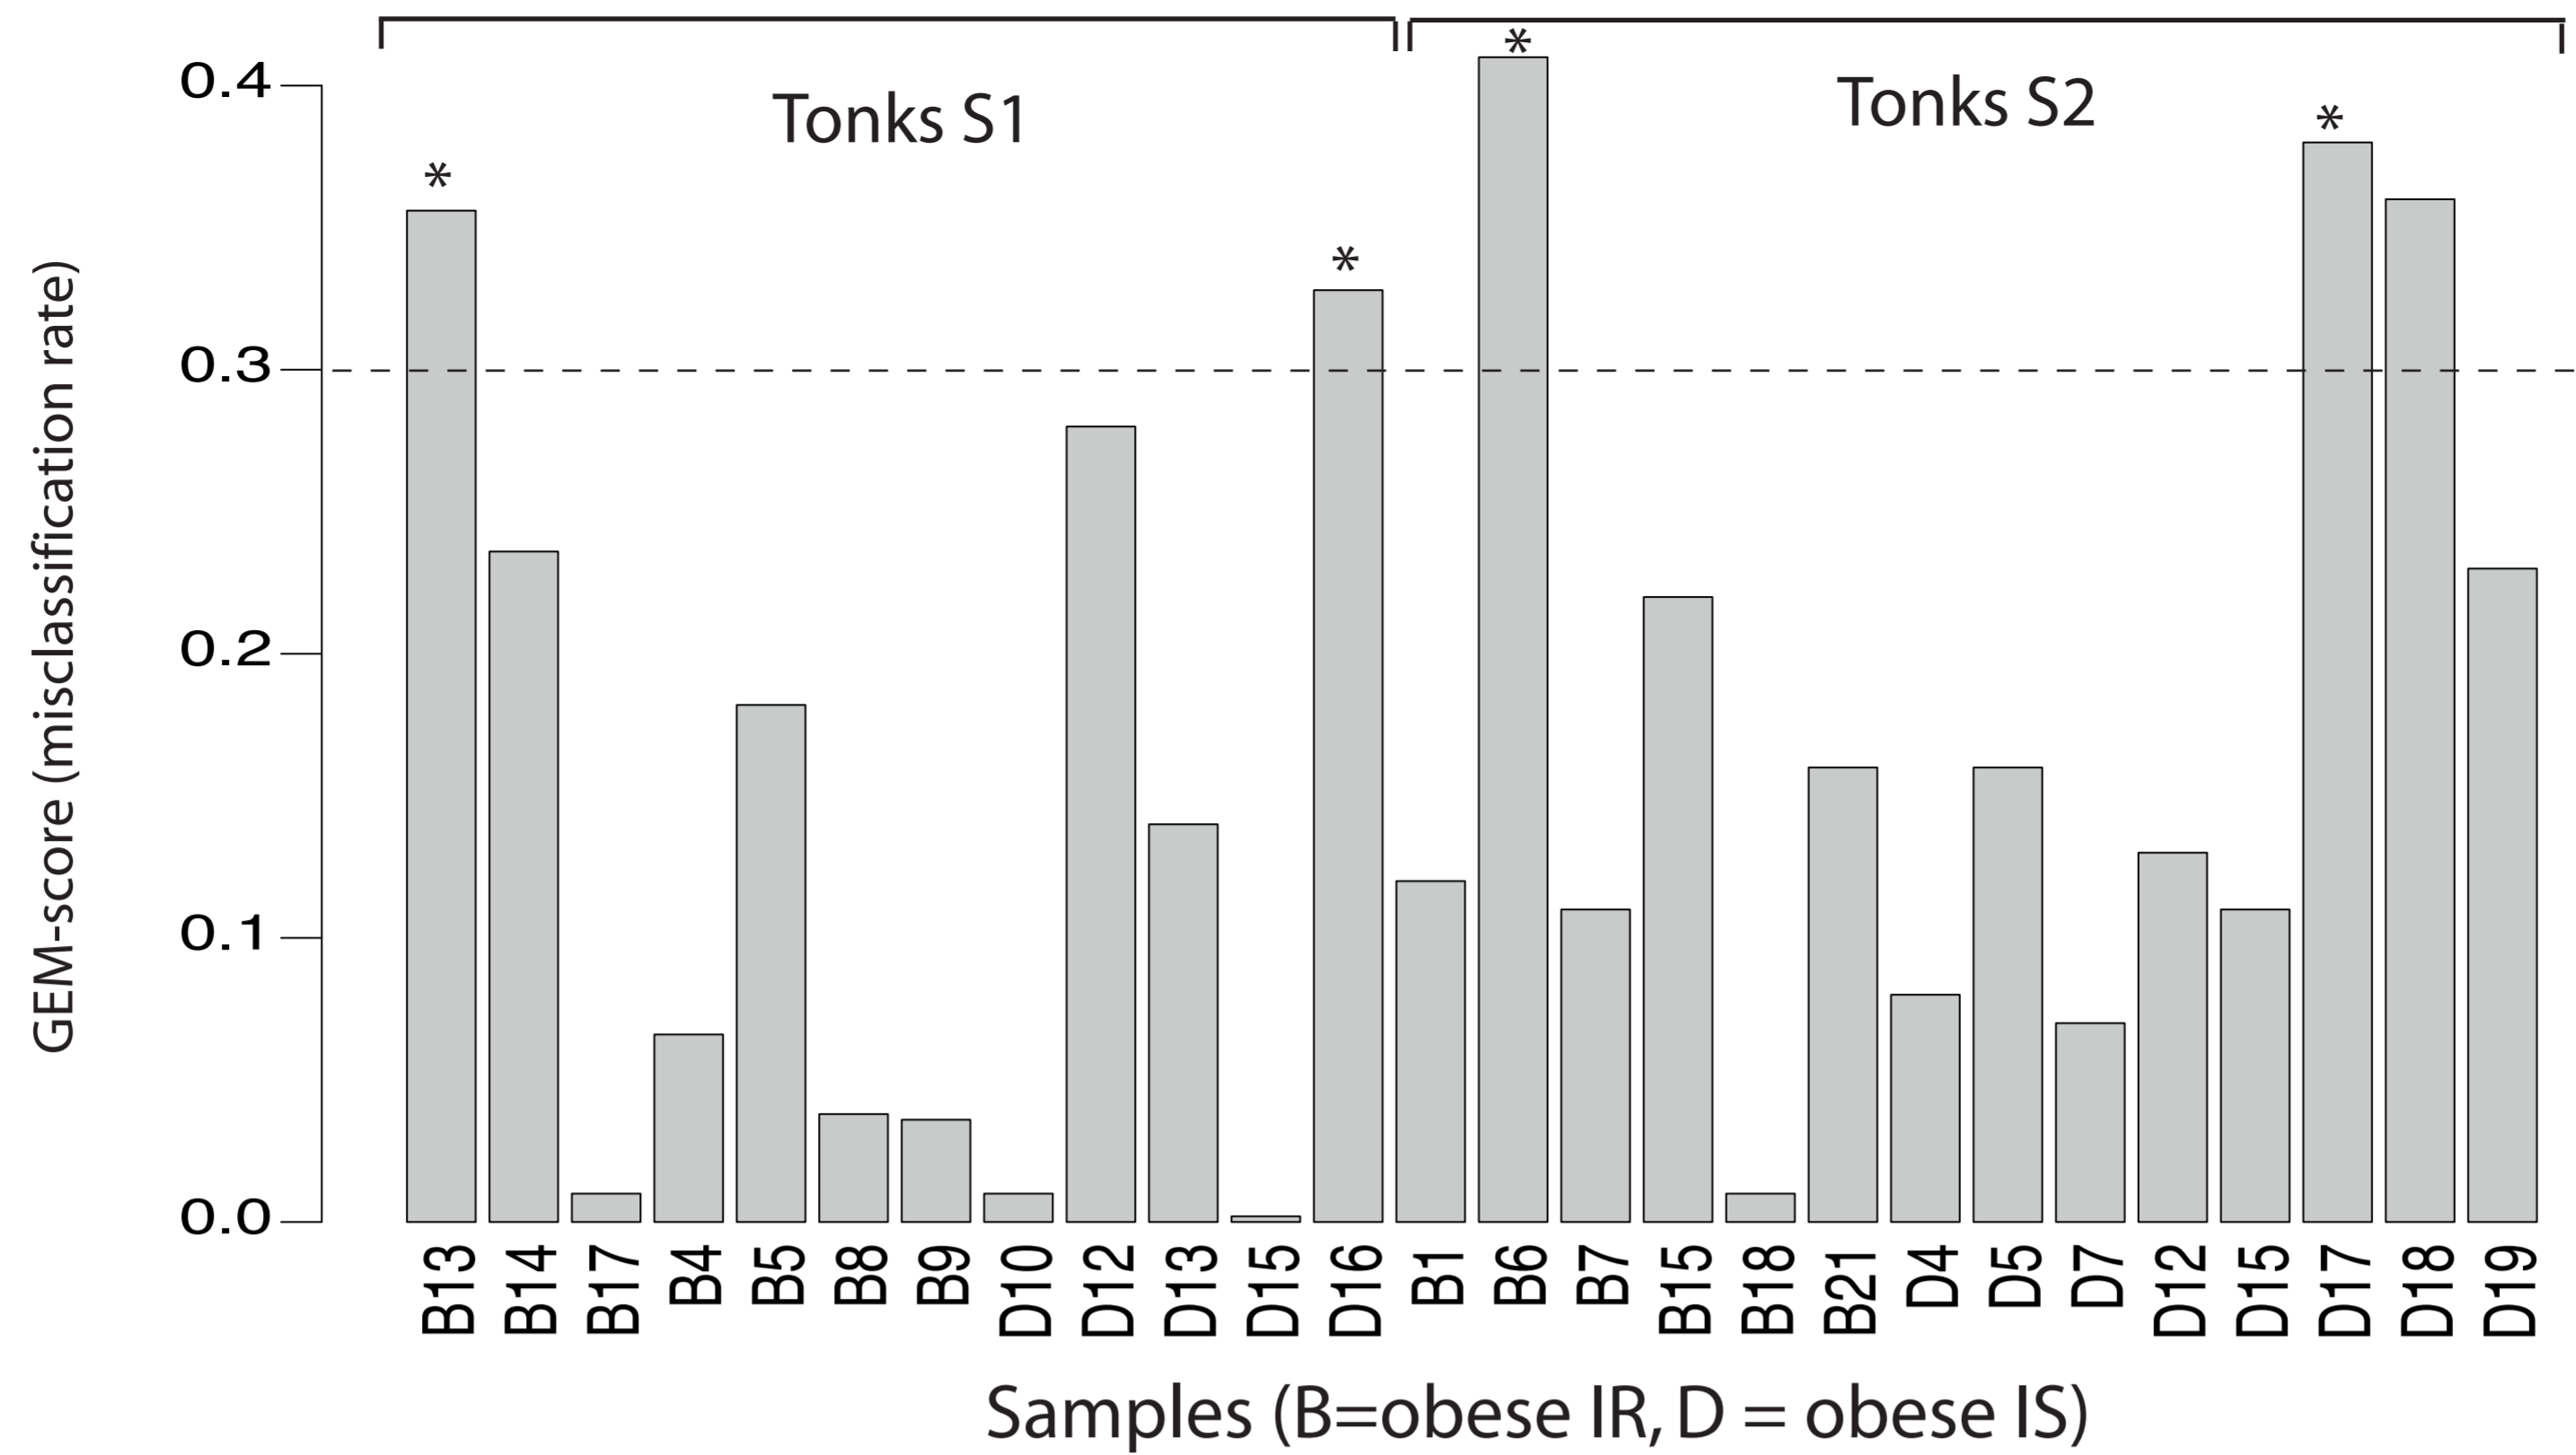**B**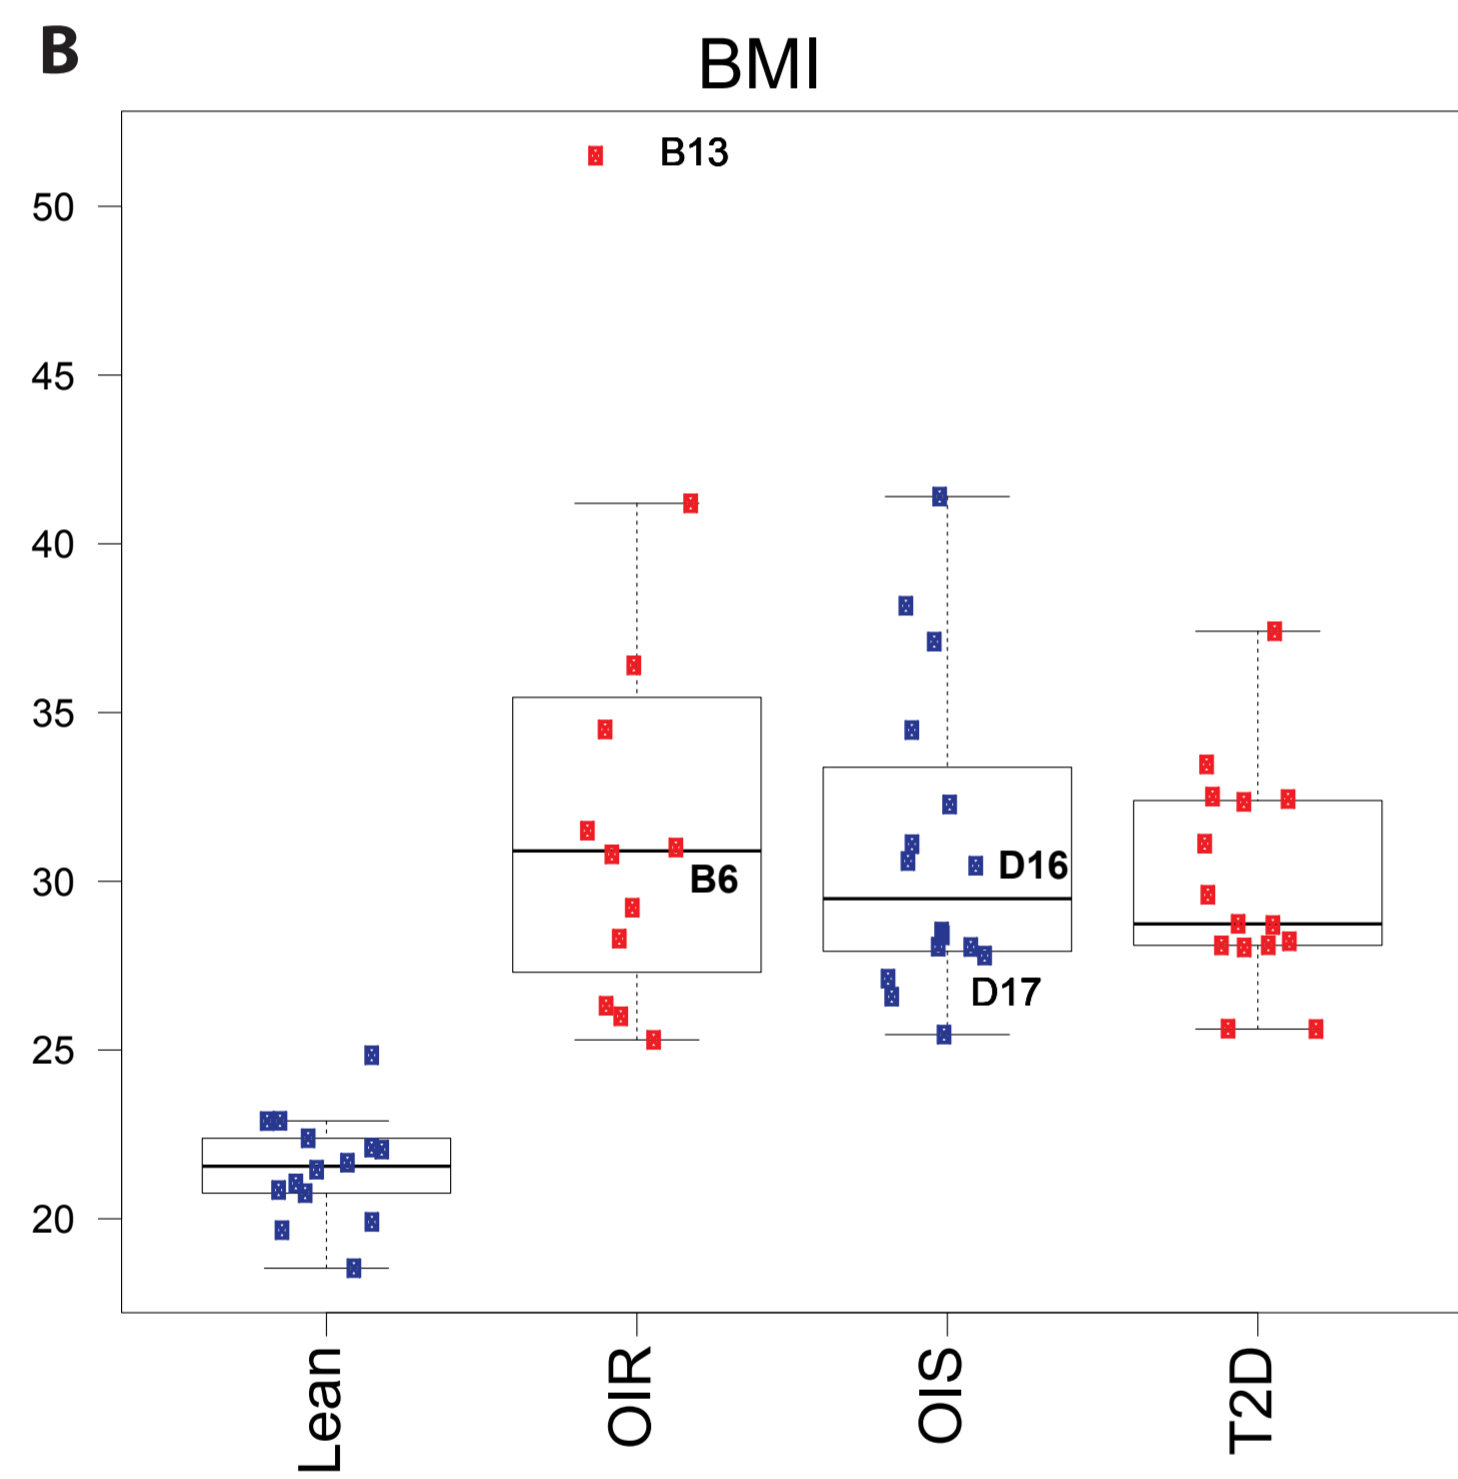**C**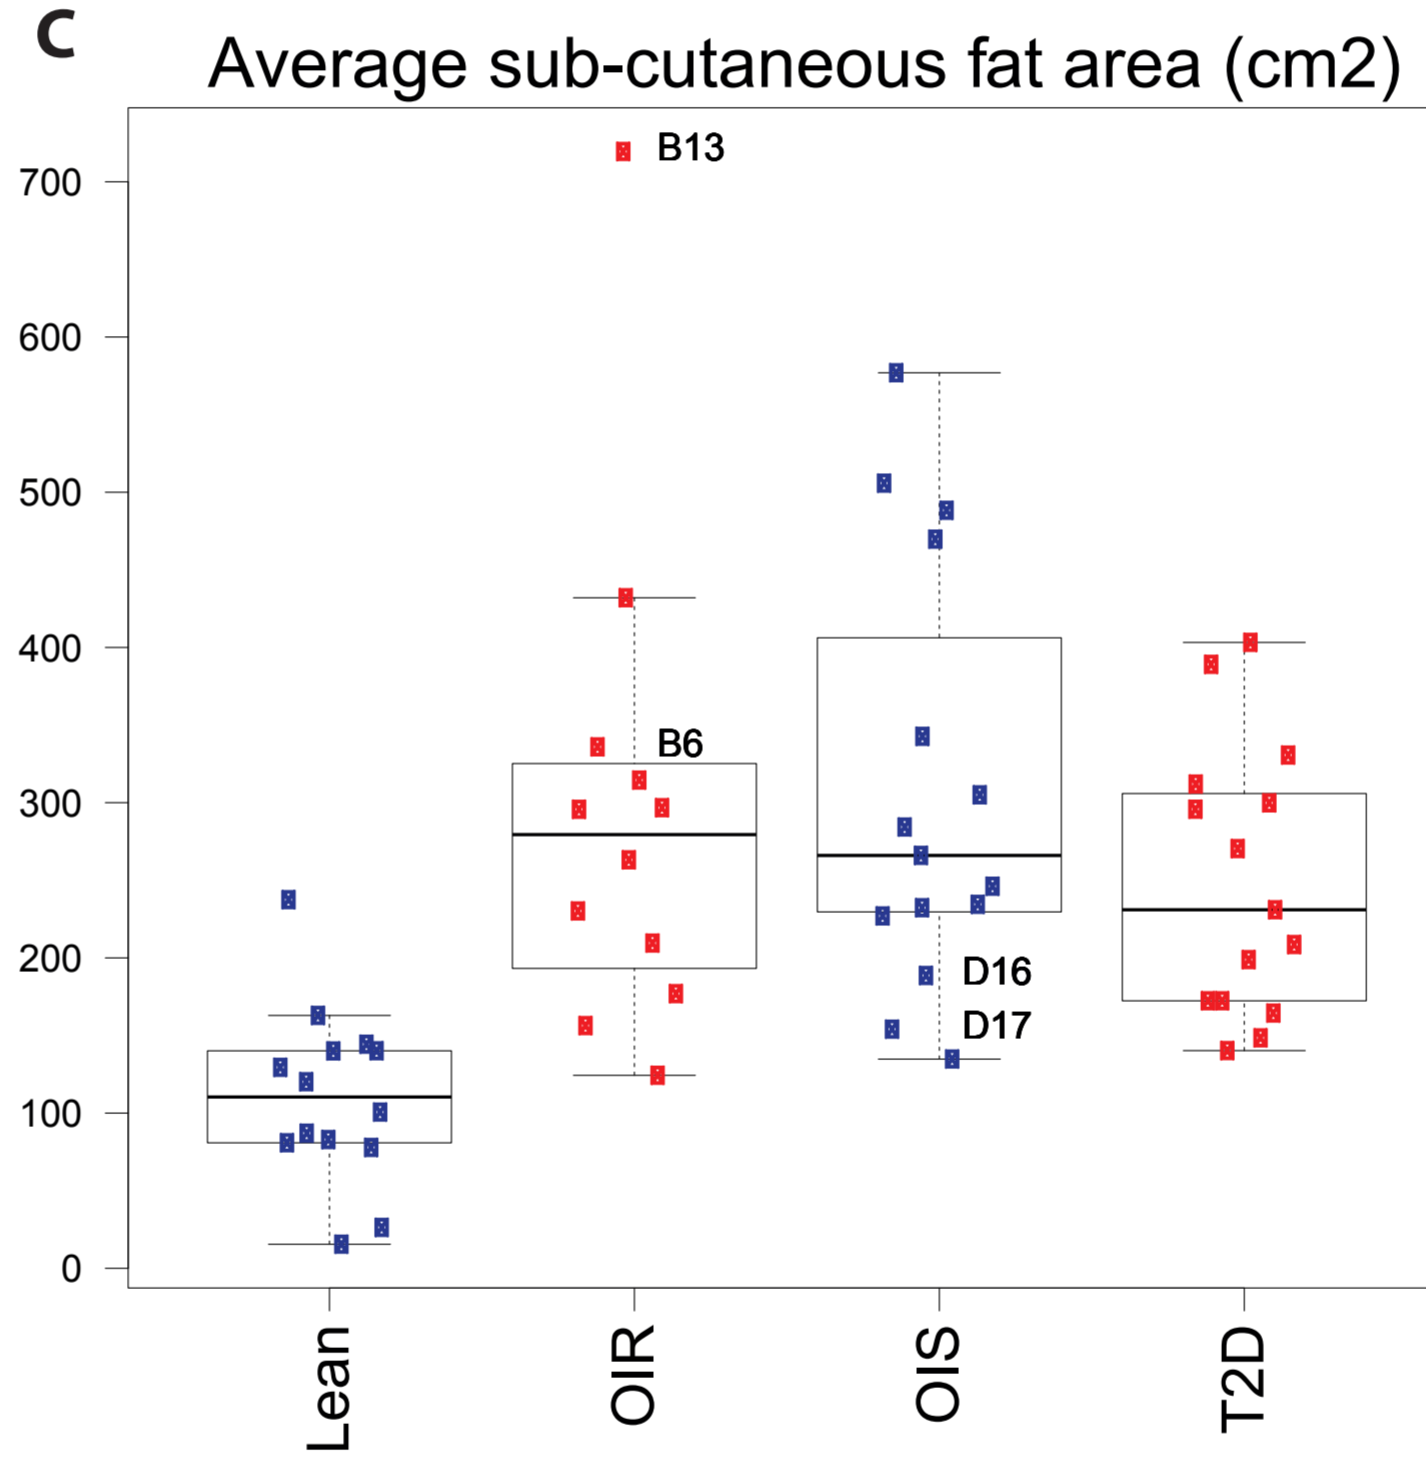**D**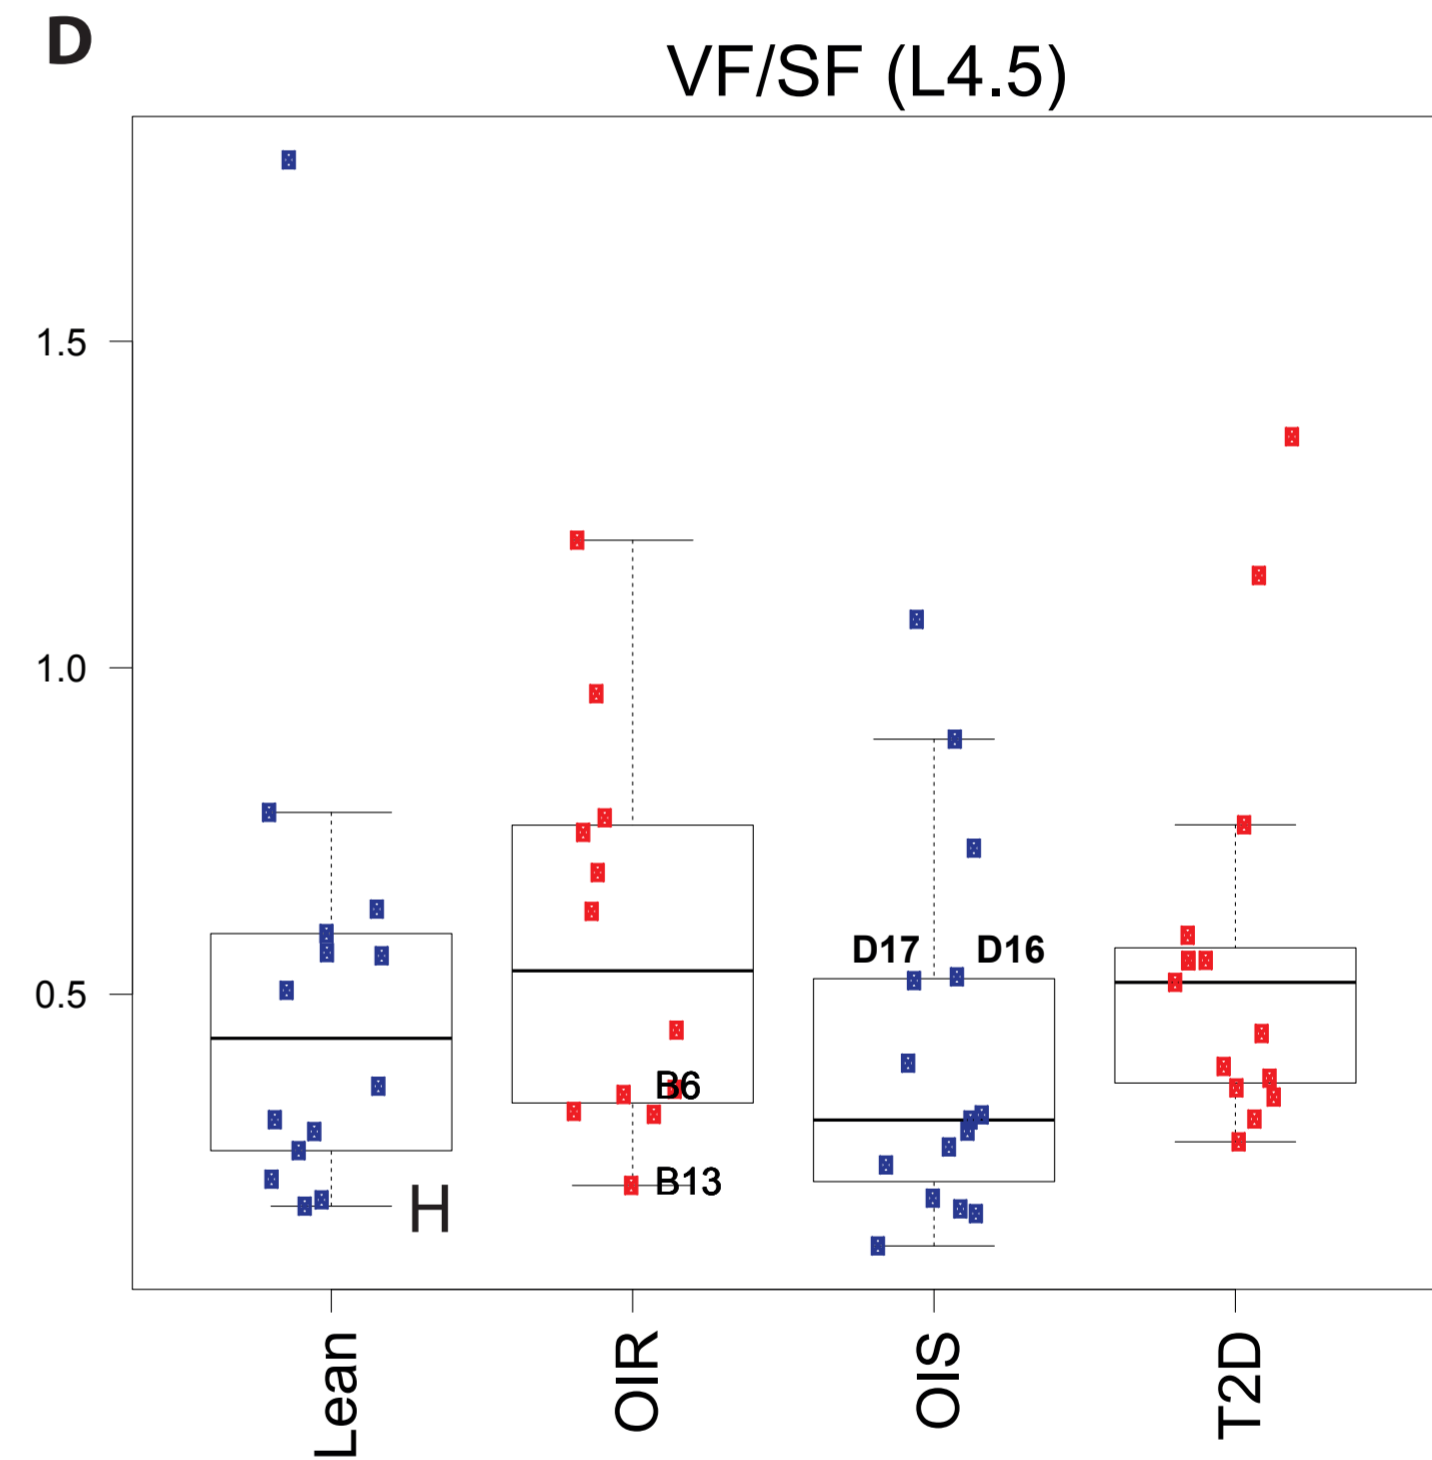**E**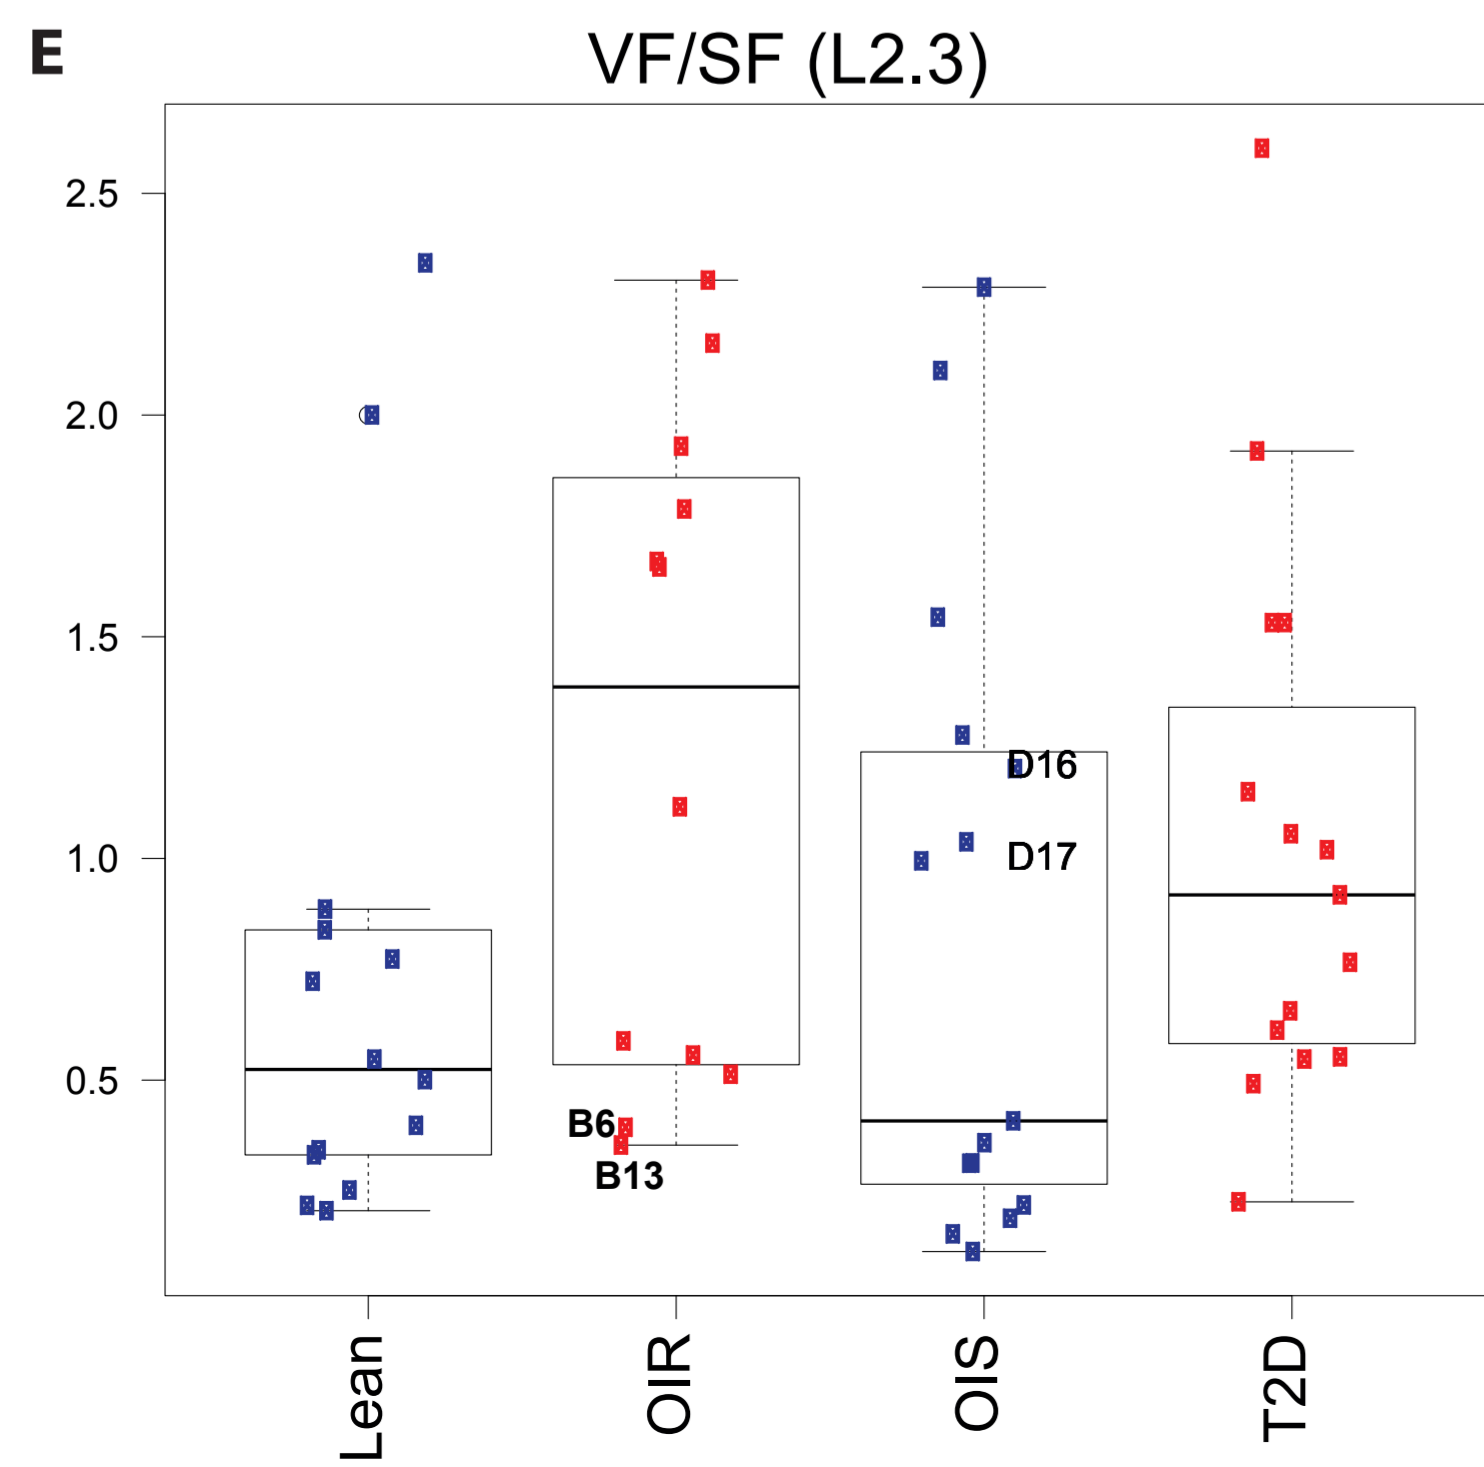**F**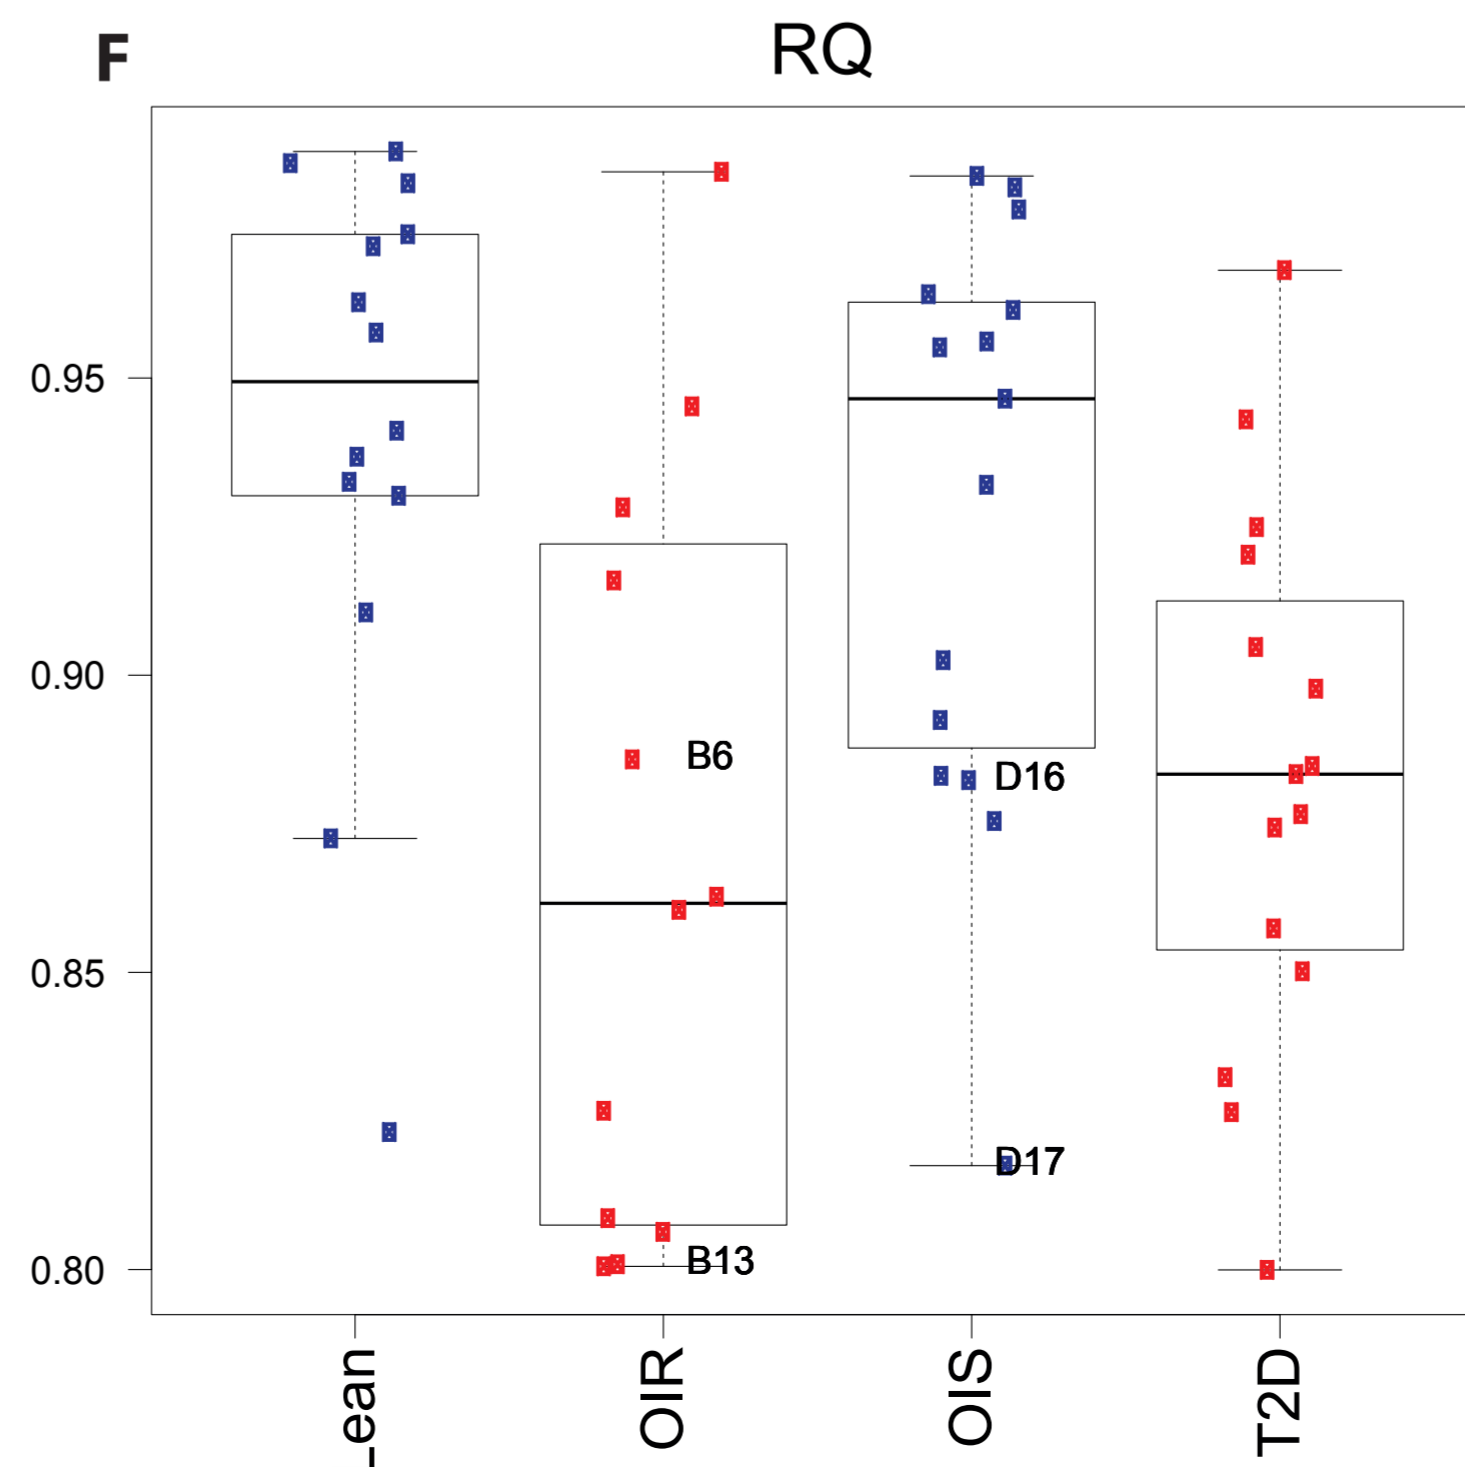**G**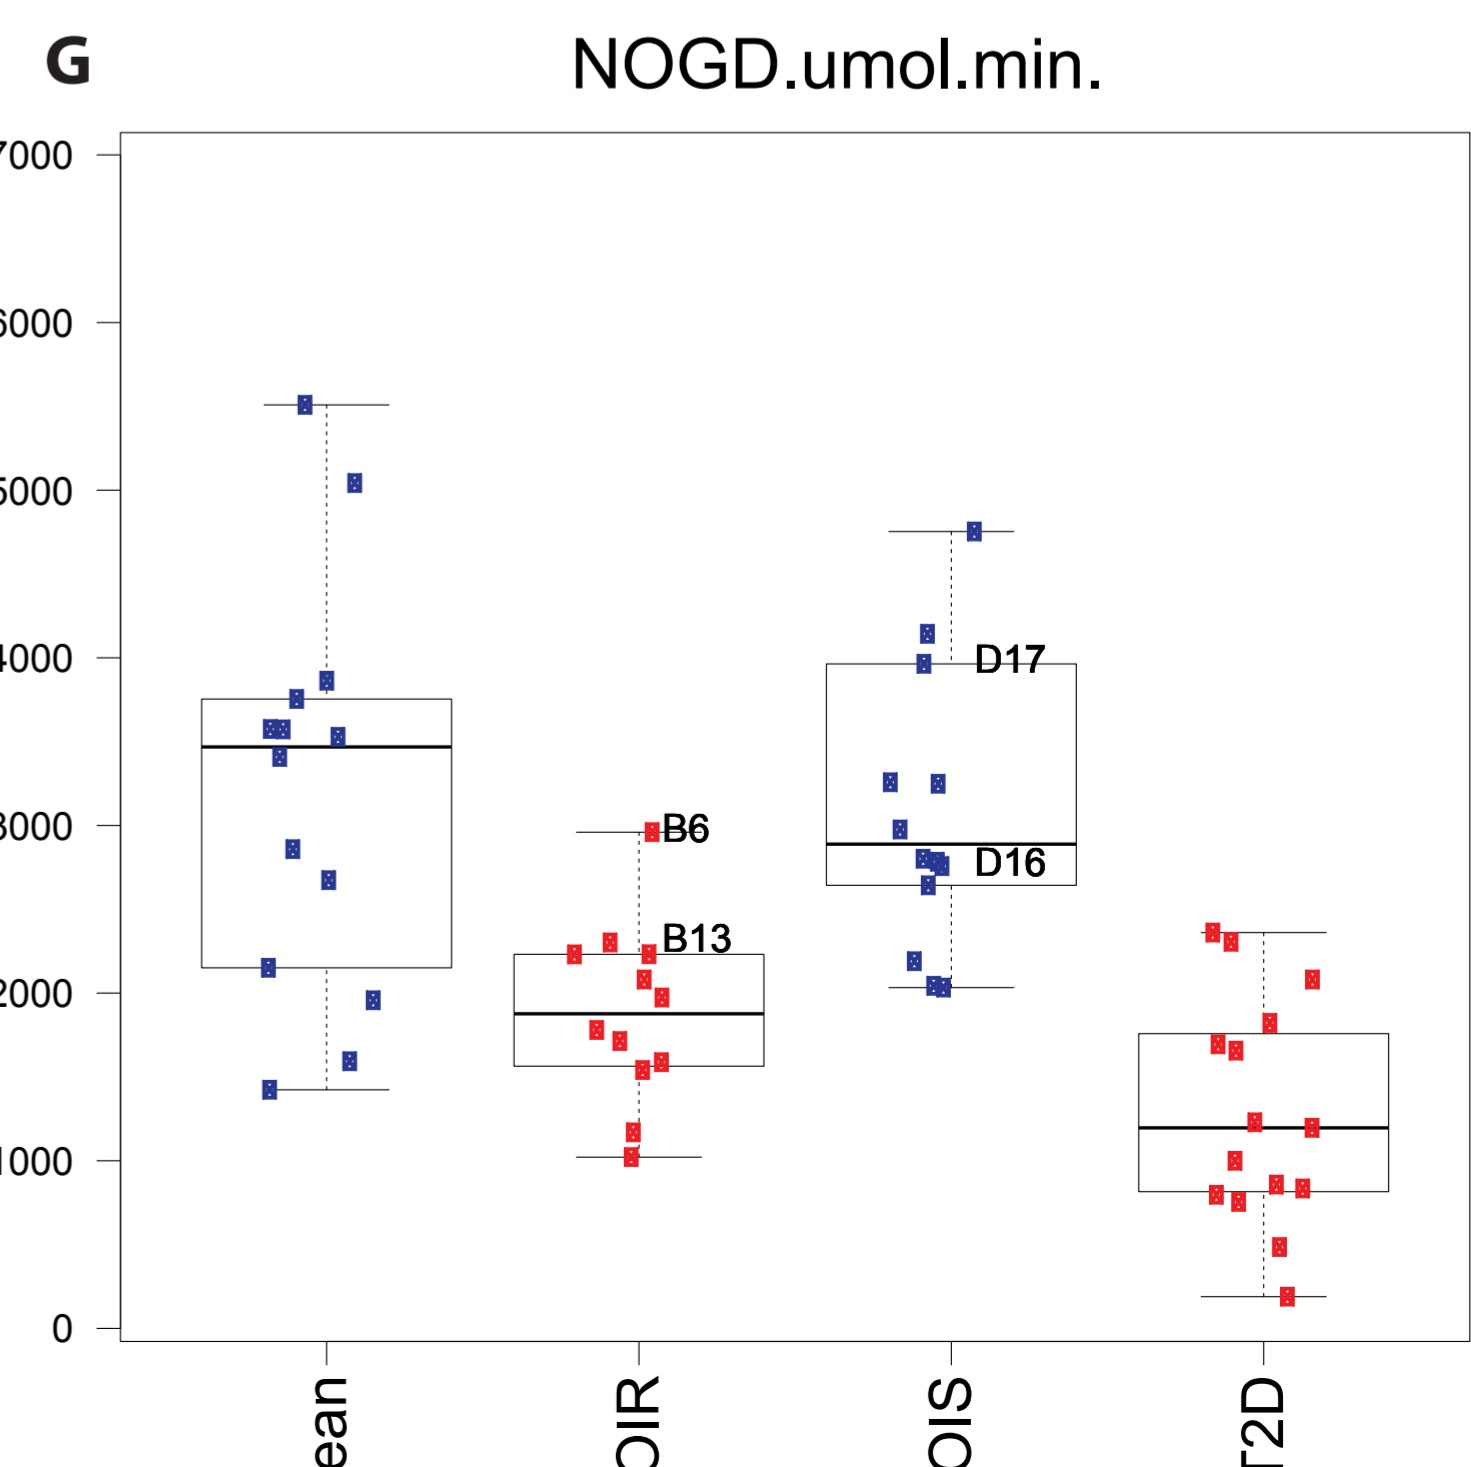

Supplement: npjsba201510-s3.pdf [file npjsba201510-s3.pdf]
